# Supplementary material
Source: Springer Nature journal article supplement (https://www.springermedizin.de/resource/supplementary/12890_2013_578_MOESM5_ESM.pdf/9505354)

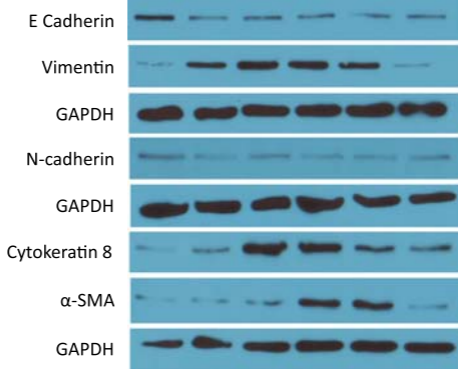

|                              |   |   |   |   |   |    |
|------------------------------|---|---|---|---|---|----|
| SAEC                         | + | + | + | + | + | +  |
| Monocyte                     | - | + | + | + | + | +  |
| HCl+ CD11a Blocking          | - | - | + | - | - | -  |
| HCl+ Scrambled peptide       | - | - | - | + | - | -  |
| HCl+ PDGF receptor inhibitor | - | - | - | - | 5 | 10 |

Supplement: MOESM5 [file 9505354]
